# Supplementary material
Source: HighWire-hosted journal article supplement (https://cmaj.ca/highwire/filestream/150992/field_highwire_adjunct_files/2/240061-res-3-at.pdf)
Supplement: 240061-res-3-at.pdf [file 240061-res-3-at.pdf]

### Appendix C. Coding tree for *Lived experiences of transgender and nonbinary people in the perioperative context*

| Theme                                                                              | Subthemes                  | Codes                                                                                                                                                                                                                                                      |
|------------------------------------------------------------------------------------|----------------------------|------------------------------------------------------------------------------------------------------------------------------------------------------------------------------------------------------------------------------------------------------------|
| <b>Justifying the need for healthcare in the face of structural discrimination</b> | Navigating information     | Provincial requirements different that WPATH, difficult to find/lack of consistency in information, do own work to find info, bureaucracy, MSI confused about process, lack of clarity around steps                                                        |
|                                                                                    | Need to educate HCPs       | Trans experts on own care/body, lack of training                                                                                                                                                                                                           |
|                                                                                    | Financial                  | Limits on provider/location of surgery, surgery seen as “elective,” paying for related costs (letters, forms, other procedures), wait times outlast funding                                                                                                |
|                                                                                    | Binary systems             | Trans men/nonbinary people in “women’s” spaces, gender marker in health records, barriers to changing gender markers, gender expression not “matching” reproductive organs, use of binary pronouns/genders/sex, mismatch between gender markers on records |
|                                                                                    | Wait times                 | Finding HCP, getting letters of approval, no providers in province, waiting for coverage, waiting for referrals                                                                                                                                            |
| <b>Fear and previous traumatic experiences</b>                                     | Fear                       | Based on previous experiences, stories of others’ experiences, anticipation of negative experience                                                                                                                                                         |
|                                                                                    | Decision-making            | Fear of being denied care, afraid to ask questions or counteract HCPs decisions, feeling bullied into specific care                                                                                                                                        |
|                                                                                    | Negative feelings/emotions | Vulnerability, impersonal, dehumanizing, “test subject,” “conveyor belt,” anxiety, disappointment/resignation with doctor, feeling triggered                                                                                                               |
| <b>Community as a source of support and information</b>                            | Other patients             | Built friendships during recovery, “going through the same thing,” learning about process/asking questions, community built at hospital pre-/post- surgery                                                                                                 |

|                                         |                     |                                                                                                                                                                                                                                                     |
|-----------------------------------------|---------------------|-----------------------------------------------------------------------------------------------------------------------------------------------------------------------------------------------------------------------------------------------------|
|                                         | Community resources | Online narratives (videos, social media), photos of results, local sexual health centre                                                                                                                                                             |
|                                         | Self                | Confidence, advocacy, happy with results                                                                                                                                                                                                            |
| <b>Impact of interactions with HCPs</b> | Negative            | Ridicule, ignore patient (e.g., unreturned phone calls), misgendering, “don’t have the interest or confidence” in learning about GAC, lost referrals, HCP in a rush, limited interaction before surgery, fixation on trans identity, gatekeeping    |
|                                         | Positive            | Excitement on part of HCP, transparent communication, willingness to learn, acknowledgement of gender/experience, feeling safe, use of gender-neutral language, having voice in own care, HCPs as advocates, better care by HCP with WPATH training |
